# Supplementary material for: Al18F-Labeling Of Heat-Sensitive Biomolecules for Positron Emission Tomography Imaging
Source: PubMed Central journal article supplement — Theranostics. 2017 Jul 14;7(11):2924–39. doi: 10.7150/thno.20094 (PMC5562226; doi:10.7150/thno.20094), 2017-07-14
Supplement: thnov07p2924s1.pdf [file thnov07p2924s1.pdf]

## Supplementary Information

### AI<sup>18</sup>F-Labeling Of Heat-Sensitive Biomolecules For Positron Emission Tomography Imaging

Frederik Cleeren<sup>1</sup>, Joan Lecina<sup>1</sup>, Muneer Ahamed<sup>1</sup>, Geert Raes<sup>2,3</sup>, Nick Devoogdt<sup>4</sup>, Vicky Caveliers<sup>4</sup>, Paul McQuade<sup>5</sup>, Daniel J Rubins<sup>5</sup>, Wenping Li<sup>5</sup>, Alfons Verbruggen<sup>1</sup>, Catarina Xavier<sup>4</sup> and Guy Bormans<sup>1\*</sup>

*\*Corresponding author*

<sup>1</sup>Laboratory for Radiopharmaceutical research, department of Pharmacy and Pharmacology, University of Leuven, Leuven, Belgium

<sup>2</sup>Laboratory of Cellular and Molecular Immunology, Vrije Universiteit Brussel, Brussels, Belgium

<sup>3</sup>VIB Laboratory of Myeloid Cell Immunology, Vrije Universiteit Brussel, Brussels, Belgium

<sup>4</sup>In Vivo Cellular and Molecular Imaging Center, Vrije Universiteit Brussel, Brussels, Belgium

<sup>5</sup>Translational Biomarkers, Merck Research Laboratories, Merck & Co., Inc., 770 Sumneytown Pike, West Point, Pennsylvania 19486, United States

#### Table of Contents

|                                                                                                                                                                            |   |
|----------------------------------------------------------------------------------------------------------------------------------------------------------------------------|---|
| <b>Figure S1:</b> Amino acid sequence of human serum albumin .....                                                                                                         | 2 |
| <b>Figure S2:</b> SEC-UV280 nm chromatogram of HSA and RESCA-HSA .....                                                                                                     | 2 |
| <b>Figure S3:</b> SEC-radio-chromatogram of [ <sup>18</sup> F]AIF-RESCA-HSA after 1, 2, 3 and 4 hours incubation in rat plasma at 37°C. ....                               | 3 |
| <b>Table S1:</b> Biodistribution of [ <sup>18</sup> F]AIF-RESCA-HSA in healthy female Wistar rats .....                                                                    | 3 |
| <b>Figure S4:</b> Blood data points of (±)-[ <sup>18</sup> F]AIF(RESCA)-HSA in healthy female Wistar rats .....                                                            | 4 |
| <b>Figure S5:</b> LC-UV280 nm chromatogram and MS spectrum of unlabeled NbV4m1199 .....                                                                                    | 4 |
| <b>Figure S6:</b> Deduced amino-acid sequence of NbV4m119. ....                                                                                                            | 5 |
| <b>Figure S7:</b> SEC-UV280 nm chromatogram of NbV4m119 and RESCA-NbV4m119.....                                                                                            | 5 |
| <b>Figure S8:</b> Radio-chromatogram and LC-UV280 nm chromatogram of [ <sup>18</sup> F]AIF-RESCA-NbV4m119 .....                                                            | 6 |
| <b>Figure S9:</b> SEC-radio-chromatogram of [ <sup>18</sup> F]AIF-RESCA-NbV4m119 after 6 hours incubation in storage buffer .....                                          | 6 |
| <b>Figure S10:</b> SEC-radio-chromatogram of [ <sup>18</sup> F]AIF-RESCA-NbV4m119 after 1, 2 and 3 hours incubation in rat plasma at 37°C. ....                            | 7 |
| <b>Table S2:</b> Biodistribution of [ <sup>18</sup> F]AIF-RESCA-NbV4m119 in naïve wild-type (WT) mice at 1 h and 3 h p.i. and in CRIG <sup>-/-</sup> mice at 3 h p.i. .... | 7 |
| <b>Figure S11:</b> Ex vivo autoradiography on renal tissue .....                                                                                                           | 7 |

**Figure S12:** SEC-radio-chromatogram of urine sample of naïve WT mouse 3 h after i.v. injection of [<sup>18</sup>F]AIF-RESCA1-NbV4m119 .....8

**Figure S13:** Analysis urine metabolites .....8

**Figure S14:** Mass Spectra of PEP04314.....9

**Table S3:** SUV<sub>120-180 min</sub> values PET/CT in rhesus monkeys .....10

|     |            |            |             |            |            |             |     |
|-----|------------|------------|-------------|------------|------------|-------------|-----|
|     | 1          | 11         | 21          | 31         | 41         | 51          |     |
|     |            |            |             |            |            |             |     |
| 1   |            |            | DAHKSE      | VAHRFKDLGE | ENFKALVLIA | FAQYLQCCPF  | 60  |
| 61  | EDHVKLVNEV | TEFAKTCVAD | ESAENCDKSL  | HTLFGDKLCT | VATLRETYGE | MADCCAKQEP  | 120 |
| 121 | ERNECFLOHK | DDNPNLPRLV | RPEVDVMCTA  | FHDNEETFLK | KYLYEIARRH | PYFYAPPELLF | 180 |
| 181 | FAKRYKAAFT | ECCQAADKAA | CLLPKLDELRL | DEGKASSAKQ | RLKCASLQKF | GERAFKAWAV  | 240 |
| 241 | ARLSQRFPKA | EFAEVSKLVT | DLTKVHTECC  | HGDLLECADD | RADLAKYICE | NQDSISSKLLK | 300 |
| 301 | ECCEKPLLEK | SHCIAEVEND | EMPADLPSLA  | ADFVESKDVC | KNYAEAKDVF | LGMFLYFYAR  | 360 |
| 361 | RHPDYSVLL  | LRLAKTYETT | LEKCCAAADP  | HECYAKVFDE | FKPLVEEPQN | LIKQNCLEFE  | 420 |
| 421 | QLGEYKFQNA | LLVRYTKKVP | QVSTPTLVEV  | SRNLGKVGSK | CCKHPEAKRM | PCAEDYLSVV  | 480 |
| 481 | LNQLCVLHEK | TPVSDRVTKC | CTESLVNRRP  | CFSALEVDET | YVPKEFNAET | FTFHADICTL  | 540 |
| 541 | SEKERQIKKQ | TALVELVKHK | PKATKEQLKA  | VMDDFAAFVE | KCKKADDKET | CFAEEGKKLV  | 600 |
| 601 | AASQAALGL  |            |             |            |            |             |     |

**Figure S1: Amino acid sequence of human serum albumin (ALBU\_HUMAN (P02768)).** Of the 609 amino acids encoded by the ALB gene and translated to form the precursor protein, only 585 amino acids are observed in the final product present in the blood; the first 24 amino acids, are cleaved after translation. HSA possesses 59 lysine residues (K) in its amino acid sequence. Reduced HSA contains 17 disulfide bonds and one free thiol group at Cys34. The theoretical average neutral molecular mass of reduced HSA is 66437.4 Da [M] (calculated for C<sub>2936</sub>H<sub>4590</sub>N<sub>786</sub>O<sub>889</sub>S<sub>41</sub>) and the observed mass after deconvolution was 66438.3 ± 0.3 Da [M].

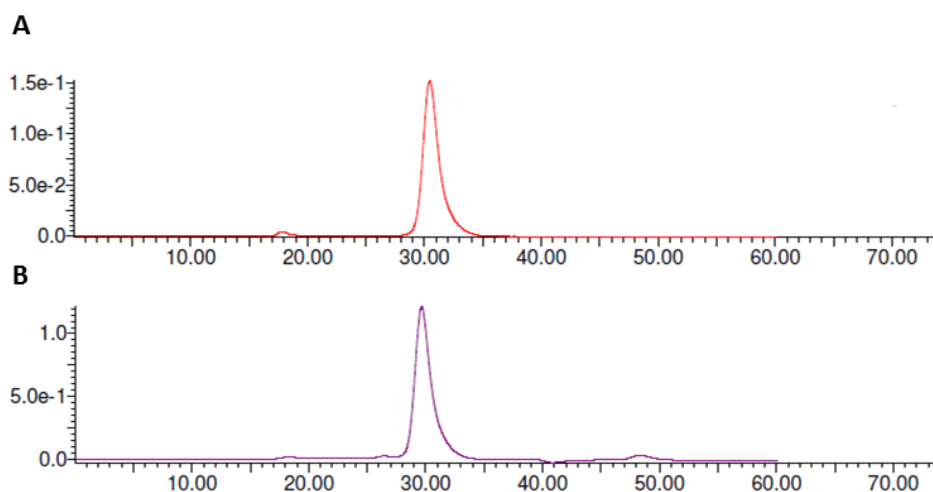

**Figure S2: SEC-UV280 nm chromatogram of (A) HSA (Rt: 30.45 min) and (B) RESCA-HSA (Rt: 29.64 min).** No aggregates or degradation products were observed.

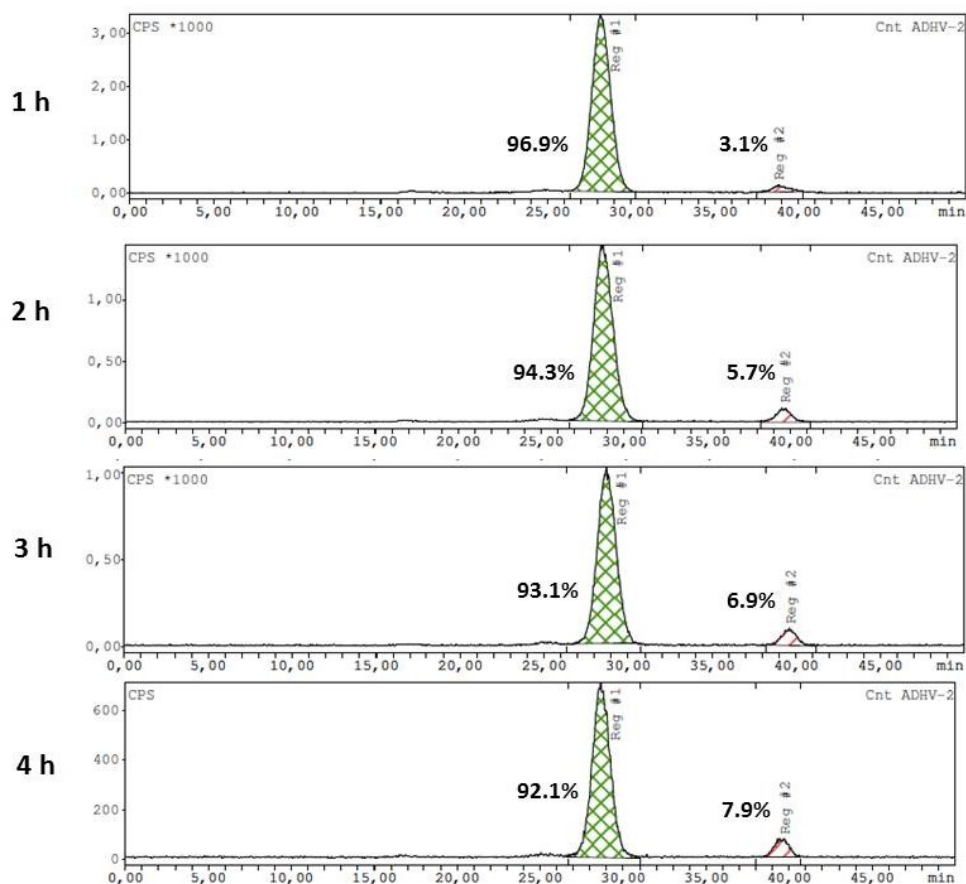

**Figure S3: SEC-radio-chromatogram of (±)-[<sup>18</sup>F]AIF(RESCA)-HSA (Rt 28.5 min) after 1, 2, 3 and 4 hours incubation in rat plasma at 37°C. After 4 h incubation in rat plasma at 37 °C, 92.1% of (±)-[<sup>18</sup>F]AIF(RESCA)-HSA was still intact.**

**Table S1: Biodistribution of (±)-[<sup>18</sup>F]AIF(RESCA)-HSA in healthy female Wistar rats at 1 h, 3 h and 6 h p.i. (n=4/ timepoint). The results are presented as standard uptake value (SUV; tissue activity (MBq/g)/[injected dose (MBq)/body weight (g)]) and with standard deviation.**

|                 | 1 h p.i | STDEV | 3 h p.i | STDEV | 6 h p.i | STDEV |
|-----------------|---------|-------|---------|-------|---------|-------|
| <b>blood</b>    | 11.76   | 0.55  | 10.10   | 0.73  | 7.94    | 0.13  |
| <b>bone</b>     | 1.24    | 0.17  | 1.53    | 0.17  | 1.89    | 0.12  |
| <b>muscle</b>   | 0.20    | 0.04  | 0.21    | 0.03  | 0.32    | 0.04  |
| <b>kidneys</b>  | 2.74    | 0.09  | 3.07    | 0.22  | 3.85    | 0.17  |
| <b>liver</b>    | 2.18    | 0.18  | 2.40    | 0.16  | 2.48    | 0.11  |
| <b>pancreas</b> | 0.71    | 0.09  | 0.65    | 0.12  | 0.99    | 0.11  |
| <b>lungs</b>    | 3.55    | 1.42  | 3.95    | 0.85  | 3.08    | 0.76  |
| <b>spleen</b>   | 1.85    | 0.17  | 1.97    | 0.22  | 2.52    | 0.07  |
| <b>heart</b>    | 2.83    | 0.61  | 2.49    | 0.40  | 2.75    | 0.74  |

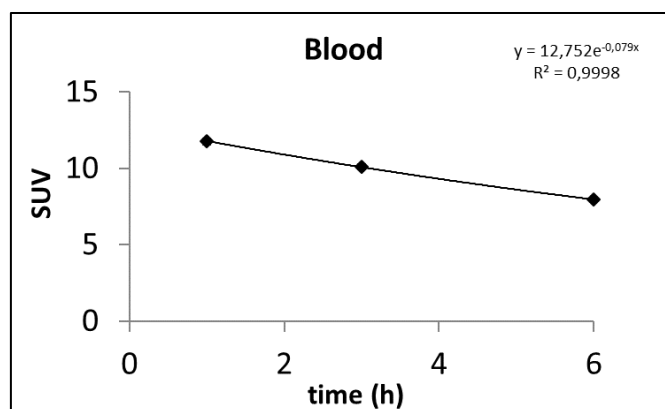

**Figure S4: Blood data points of (±)-[<sup>18</sup>F]AIF(RESCA)-HSA in healthy female Wistar rats.** Blood data points were fitted with a one- component exponential equation ( $y = 12.75e^{(-0.08x)}$ ;  $R^2 = 0.9998$ ), from which the blood biological half-life ( $T_b$ ) was calculated to be 8.7 h.

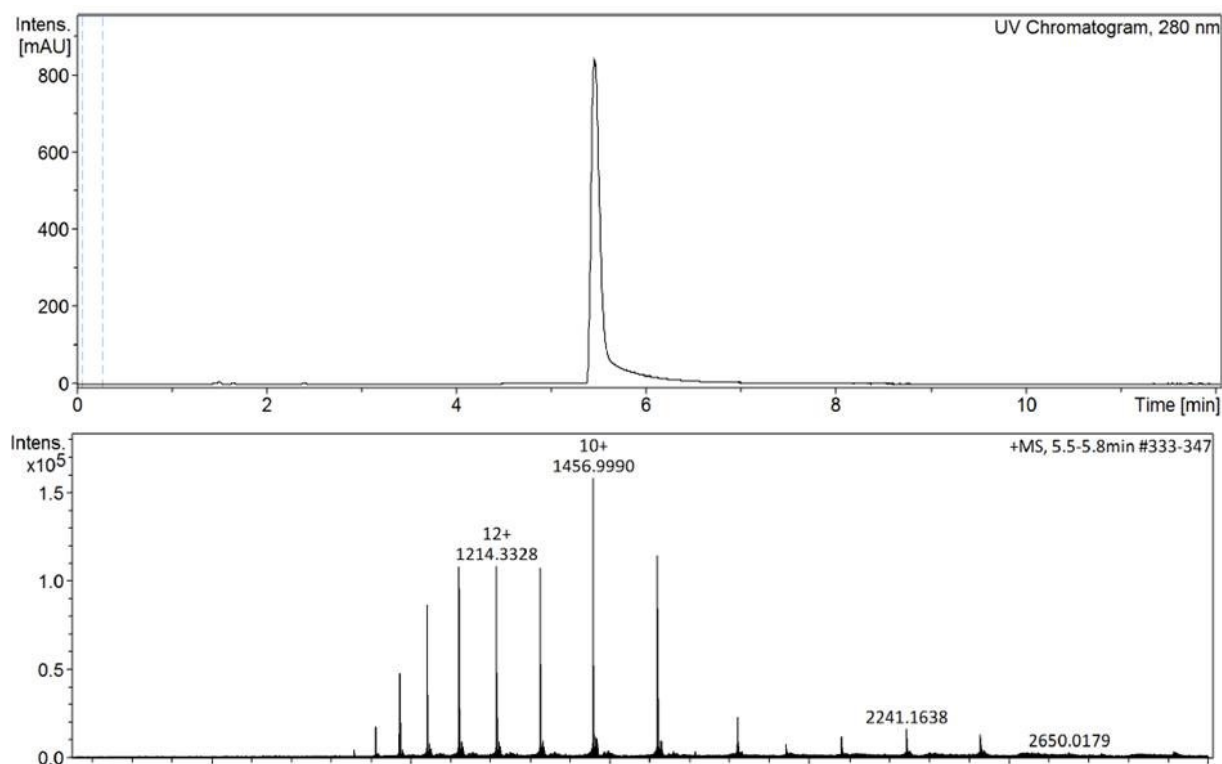

**Figure S5: (A) RPLC-UV280 nm chromatogram of unlabeled NbV4m119 (Rt: 5.5 min) and (B) MS spectrum of unlabeled NbV4m119.** The theoretical average neutral molecular mass of the unlabeled NbV4m119 was 14577.85 Da [M] (Calculated for  $C_{643}H_{950}N_{188}O_{196}S_4$ ) and the observed mass after deconvolution was  $14577.61 \pm 0.02$  Da [M].

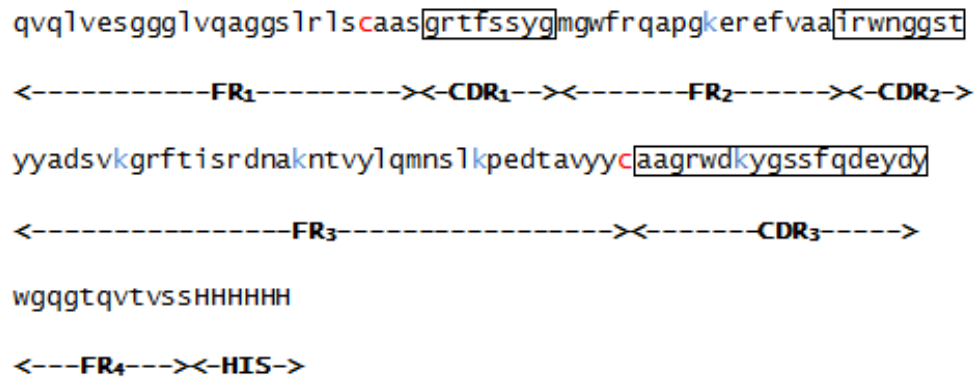

**Fig S6: Deduced amino-acid sequence of NbV4m119, consisting of complementarity determining regions (CDR) sequences alternated with structural framework (FR) sequences and hexahistidine tag (HIS).** The CDR<sub>1</sub>, CDR<sub>2</sub> and CDR<sub>3</sub> regions are indicated in boxes. The cysteines (structural cysteine 23(1st-CYS) and cysteine 104(2nd-CYS)) are highlighted in red. NbV4m119 possesses 5 lysine residues in its amino acid sequence (highlighted) in blue. The hexahistidine tag was inserted genetically for the purpose of immobilized metal ion affinity chromatography purification .

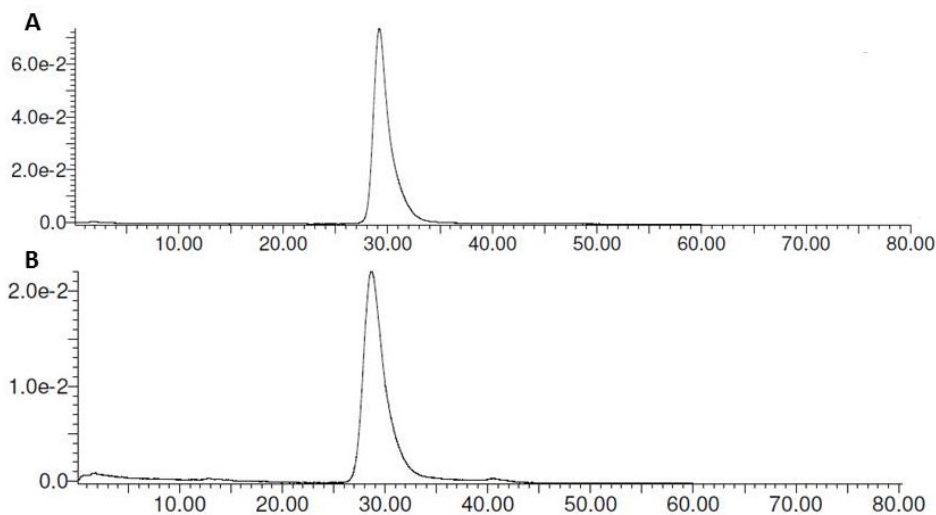

**Figure S7: SEC-UV280 nm chromatogram of (A) NbV4m119 (Rt: 29.19 min) and (B) purified RESCA-NbV4m119 (Rt 28.68 min).** No aggregates or degradation products were observed.

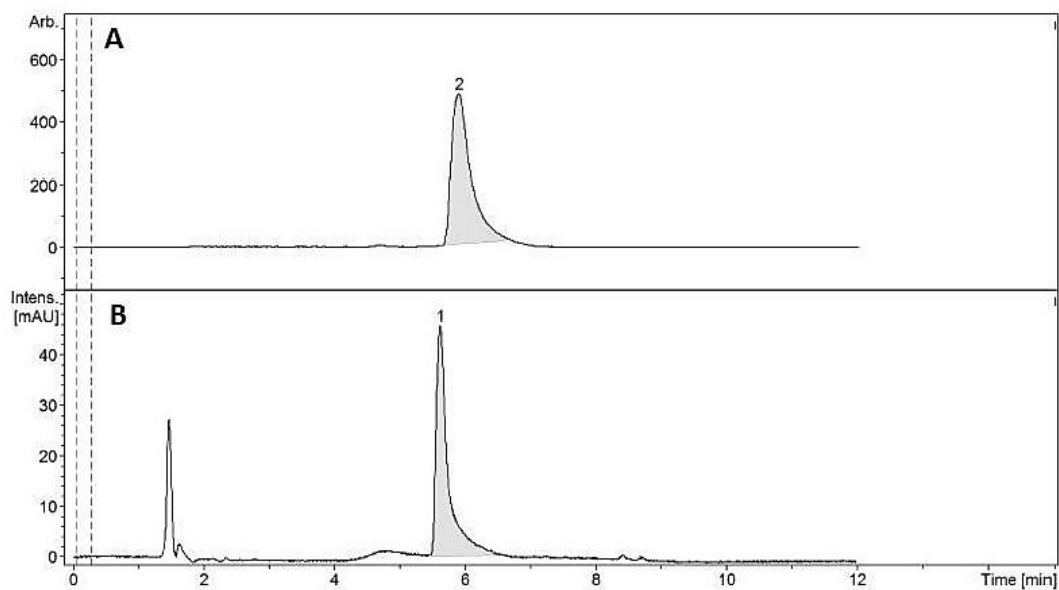

**Figure S8: (A) radio-chromatogram of (±)- $^{18}\text{F}$ AIF(RESCA)-NbV4m119 (Rt 5.9 min) and (B) RPLC-UV280 nm chromatogram of (±)- $^{18}\text{F}$ AIF(RESCA)-NbV4m119 (Rt: 5.6 min).**

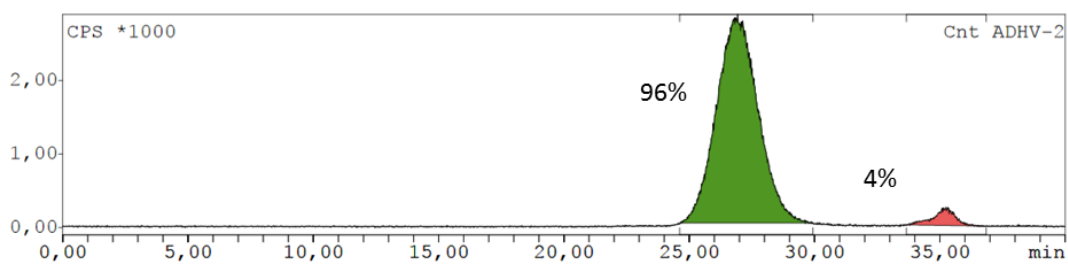

**Figure S9: SEC-radio-chromatogram of (±)- $^{18}\text{F}$ AIF(RESCA)-NbV4m119 (Rt 26.9 min) after 6 hours incubation in storage buffer. 468 MBq (±)- $^{18}\text{F}$ AIF(RESCA)-NbV4m119 in 4 ml sodium phosphate buffer (0.01 M, pH 7.4, 0.14 M NaCl).**

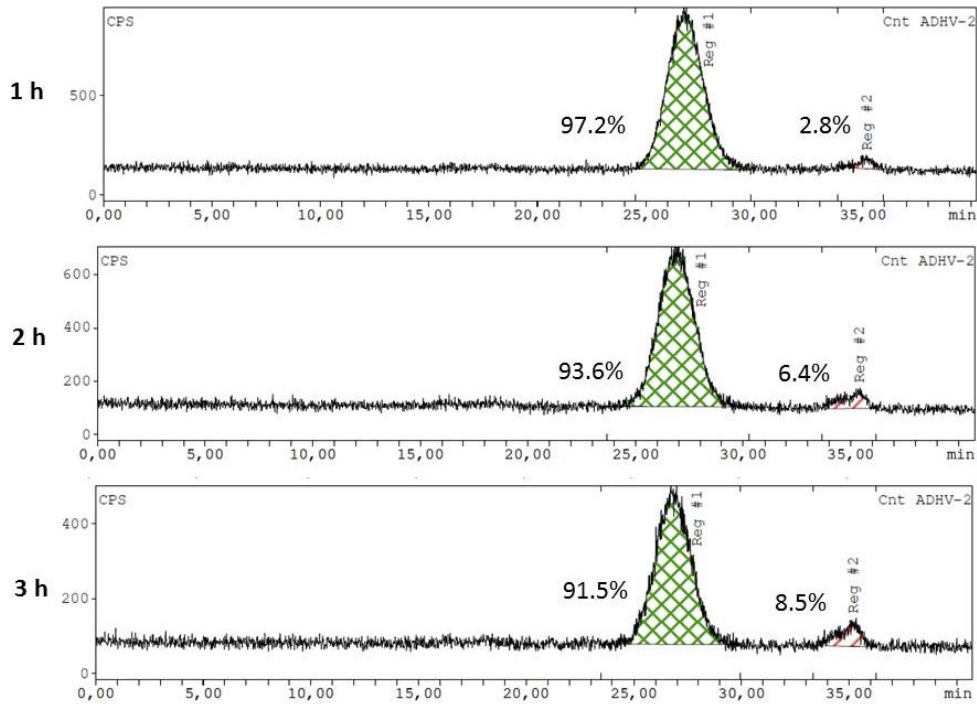

**Figure S10:** SEC-radio-chromatogram of (±)-[<sup>18</sup>F]AIF(RESCA)-NbV4m119 (Rt 26.9 min) after 1, 2 and 3 hours incubation in rat plasma at 37°C. After 3 h incubation in rat plasma at 37 °C, 91.5% of (±)-[<sup>18</sup>F]AIF(RESCA)-NbV4m119 was still intact.

**Table S2:** Biodistribution of (±)-[<sup>18</sup>F]AIF(RESCA)-NbV4m119 in wild-type (WT) mice at 1 h and 3 h p.i. and in CR1g<sup>-/-</sup> mice at 3 h p.i.. The results are presented as average standard uptake value (SUV; tissue activity (MBq/g)/[injected dose (MBq)/body weight (g)]) and with standard deviation, (n=3/group). \*\*P < 0.005, \*\*\*P < 0.001

|                 | 1 h p.i<br>WT | STDEV | 3 h p.i<br>WT | STDEV | 3 h p.i<br>CR1g <sup>-/-</sup> | STDEV |
|-----------------|---------------|-------|---------------|-------|--------------------------------|-------|
| <b>blood</b>    | 0.20          | 0.02  | 0.13          | 0.02  | 0.05                           | 0.01  |
| <b>bone</b>     | 0.57          | 0.07  | 1.01          | 0.30  | 0.93                           | 0.09  |
| <b>muscle</b>   | 0.10          | 0.03  | 0.07          | 0.00  | 0.03                           | 0.00  |
| <b>kidneys</b>  | 37.63         | 4.76  | 8.89**        | 2.25  | 19.69**                        | 2.37  |
| <b>liver</b>    | 2.38          | 0.36  | 2.31***       | 0.15  | 0.27***                        | 0.10  |
| <b>pancreas</b> | 0.21          | 0.08  | 0.12          | 0.04  | 0.04                           | 0.02  |
| <b>lungs</b>    | 2.23          | 0.26  | 0.83          | 0.90  | 0.69                           | 0.47  |
| <b>spleen</b>   | 0.29          | 0.06  | 0.22          | 0.13  | 0.28                           | 0.20  |

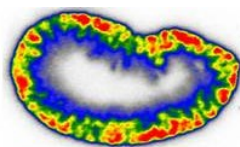

**Figure S11:** Ex vivo autoradiography on renal tissue of naïve WT mouse injected with (±)-[<sup>18</sup>F]AIF(RESCA)-NbV4m119 and sacrificed at 1 h after i.v. injection

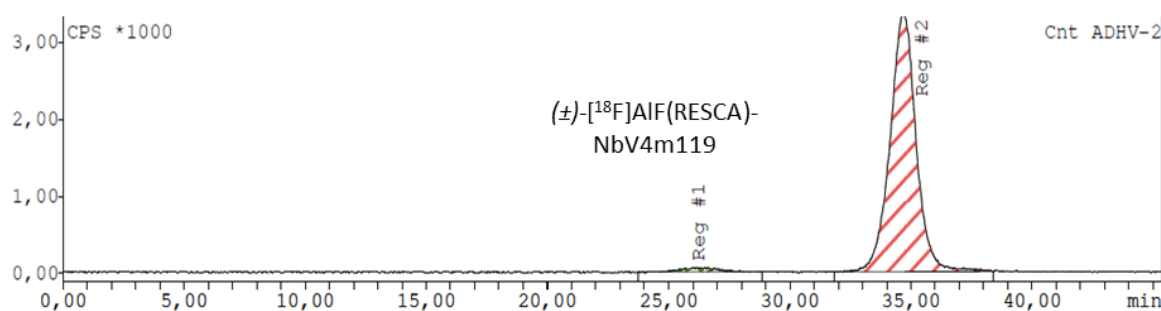

**Figure S12: SEC-radio-chromatogram of urine sample of naïve WT mouse 3 h after i.v. injection of (±)-[<sup>18</sup>F]AlF(RESCA)-NbV4m119. Only 2.2% of (±)-[<sup>18</sup>F]AlF(RESCA)-NbV4m119 (Rt 26.2 min) is still intact, the rest of activity (97.9%) elutes under the form of small <sup>18</sup>F-labeled degradation products, [<sup>18</sup>F]F<sup>-</sup> and/or different Al<sup>18</sup>F-species (Rt 34.7 min)**

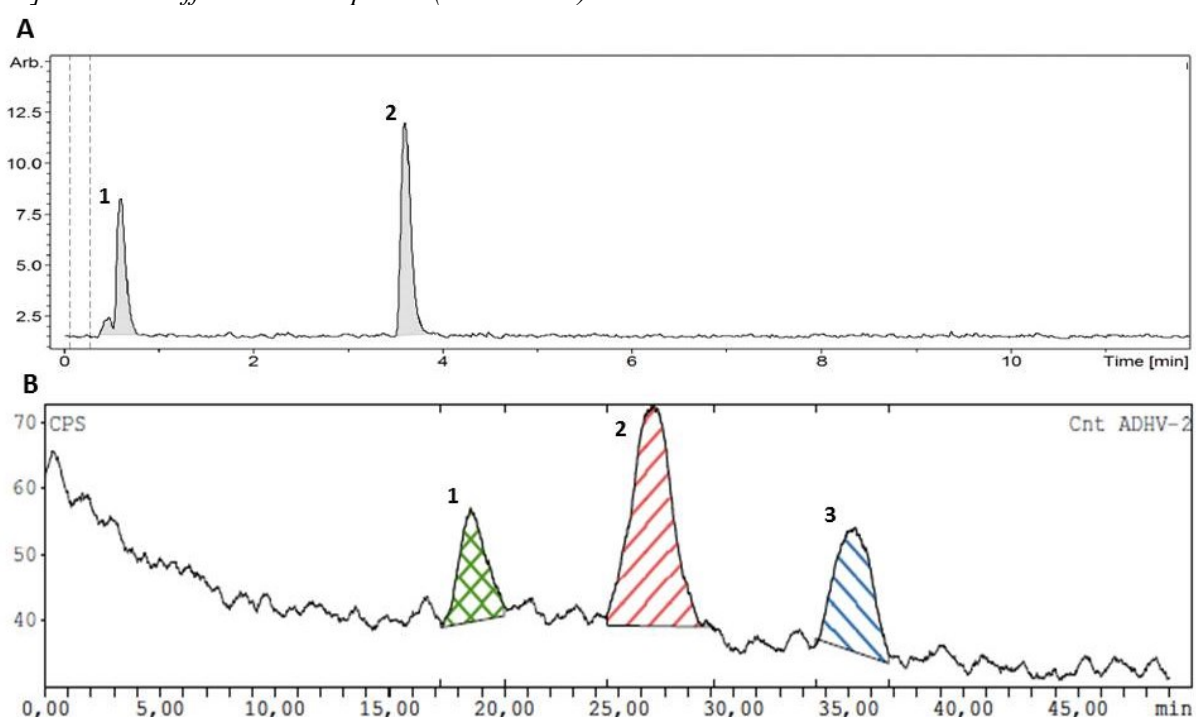

**Figure S13: Analysis of metabolites in urine and plasma** **A:** RP-HPLC analysis of the radiometabolite fraction eluting at 34.7 min on size exclusion HPLC of urine obtained from naïve WT mouse 1 h after i.v. injection of (±)-[<sup>18</sup>F]AlF(RESCA)-NbV4m119 (**Figure S12**). An Acquity UPLC BEH C18 column (1.7 μm, 2.1 mm x 150 mm, Waters) was used with following method: Solvent A (H<sub>2</sub>O) and solvent B (acetonitrile), flow rate 0.3 ml/min. The elution gradient was: 0-1 min: 99% A; 1-7 min: from 99% A to 1% A; 7-10 min: 1% A; 10.1-12 min: 99% A. Two major peaks are observed: peak 1, (Rt 0.6 min, 40 %) and peak 2 (Rt 3.6 min, 60%). The radiometabolites eluting at the void volume (peak 1, 40%) are probably [<sup>18</sup>F]{AlF}<sup>2+</sup>, [<sup>18</sup>F]F<sup>-</sup> and/or very polar fluorine-18 containing degradation fragments of (±)-[<sup>18</sup>F]AlF(RESCA)-NbV4m119. The remaining fraction (60%) elutes later (peak 2) which indicates that this fraction consist of a somewhat more lipophilic radiometabolite of [<sup>18</sup>F]AlF-RESCA-NbV4m119. **B:** SEC-radio-chromatogram of a plasma sample of naïve WT mouse 1 h after i.v. injection of [<sup>18</sup>F]AlF-RESCA-NbV4m119. The tracer was partially bound to other proteins present in plasma (peak 1, Rt 18.4 min 19%), 54% of tracer was observed as intact (±)-[<sup>18</sup>F]AlF(RESCA)-NbV4m119 (peak 2, Rt 26.8 min) and 27% of tracer was degraded in low molecular weight radiometabolites (peak 3, Rt 35.1 min). Studies with (±)-[<sup>18</sup>F]AlF(RESCA)-HSA, which is not excreted by the kidneys due to the high molecular weight of albumin, confirms the high in vivo stability in blood of the Al<sup>18</sup>F-RESCA complex because only minor increase in bone uptake was observed over time.



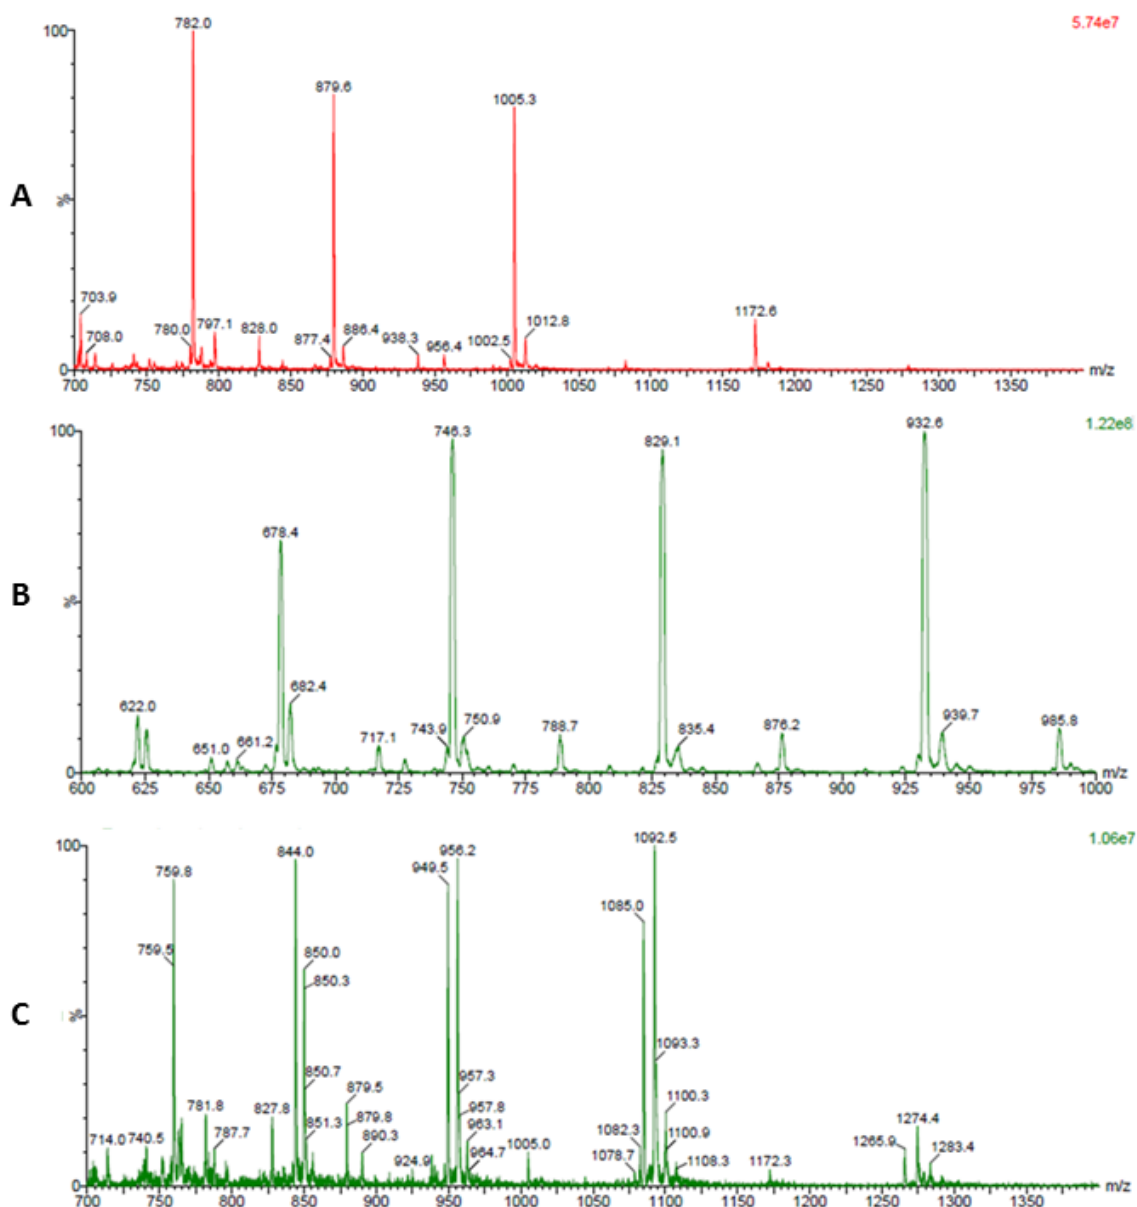

**Figure S14: Mass Spectra of PEP04314.** MS spectra before (A) and after conjugation with maleimide-mono-amide-NOTA (B) and (±)-H<sub>3</sub>RESCA-maleimide (C). The observed molecular weight of PEP04314 was 7029.9 Da. The observed molecular weight of H<sub>2</sub>NOTA-PEP04314 and (±)-H<sub>3</sub>RESCA-PEP04314 was 7453 Da and 7588 Da, respectively. For compound (±)-H<sub>3</sub>RESCA-PEP04314 we also observed a species with a molecular weight of 7640 Da, which is assumed to be the iron complex of (±)-H<sub>3</sub>RESCA-PEP04314 ((±)-Fe(RESCA)-PEP04314).

**Table S3:  $SUV_{120-180 \text{ min}}$  of ( $\pm$ )- $[^{18}\text{F}]\text{AIF(RESCA)-PEP04314}$  and  $[^{18}\text{F}]\text{AIF(NOTA)-PEP04314}$ . Standardized uptake values 120-180 min after tracer administration ( $SUV_{120-180 \text{ min}}$ ; tissue activity ( $\text{MBq}/\text{cm}^3$ )/[injected dose ( $\text{MBq}$ )/body weight ( $\text{g}$ )] of ( $\pm$ )- $[^{18}\text{F}]\text{AIF(RESCA)-PEP04314}$  ( $n=3$ ;  $n=1$  in rhesus monkey A,  $n=1$  in rhesus monkey B,  $n=1$  in rhesus monkey C) and  $[^{18}\text{F}]\text{AIF(NOTA)-PEP04314}$  ( $n=6$ ;  $n=2$  in rhesus monkey A,  $n=2$  in rhesus monkey B,  $n=2$  in rhesus monkey D). Regions of Interest (ROIs) were drawn for liver, kidney cortex, heart blood pool, salivary glands, bladder, lung, and muscle using both the PET and CT images to guide ROI placement. Bone ROIs were drawn on the lumbar spine.**

| <b>Rhesus monkey A</b>                                 |       |               |                  |         |                 |      |        |      |
|--------------------------------------------------------|-------|---------------|------------------|---------|-----------------|------|--------|------|
| $[^{18}\text{F}]\text{AIF(NOTA)-PEP04314}$             | Liver | Kidney Cortex | Heart Blood Pool | Bladder | Salivary Glands | Lung | Muscle | Bone |
|                                                        | 8.0   | 70.1          | 1.0              | 4.6     | 3.7             | 0.3  | 0.1    | 1.6  |
|                                                        | 12.7  | 66.0          | 1.1              | 4.5     | 3.6             | 0.3  | 0.2    | 0.9  |
| ( $\pm$ )- $[^{18}\text{F}]\text{AIF(RESCA)-PEP04314}$ | Liver | Kidney Cortex | Heart Blood Pool | Bladder | Salivary Glands | Lung | Muscle | Bone |
|                                                        | 10.6  | 36.5          | 2.6              | 21.0    | 4.9             | 0.5  | 0.3    | 2.4  |
|                                                        |       |               |                  |         |                 |      |        |      |
| <b>Rhesus monkey B</b>                                 |       |               |                  |         |                 |      |        |      |
| $[^{18}\text{F}]\text{AIF(NOTA)-PEP04314}$             | Liver | Kidney Cortex | Heart Blood Pool | Bladder | Salivary Glands | Lung | Muscle | Bone |
|                                                        | 8.2   | 47.0          | 0.8              | 4.6     | 2.8             | 0.5  | 0.2    | 0.7  |
|                                                        | 8.0   | 63.6          | 0.9              | 6.9     | 3.1             | 0.4  | 0.2    | 0.8  |
| ( $\pm$ )- $[^{18}\text{F}]\text{AIF(RESCA)-PEP04314}$ | Liver | Kidney Cortex | Heart Blood Pool | Bladder | Salivary Glands | Lung | Muscle | Bone |
|                                                        | 9.6   | 22.3          | 1.7              | 13.3    | 4.1             | 0.6  | 0.3    | 1.5  |
|                                                        |       |               |                  |         |                 |      |        |      |
| <b>Rhesus monkey C</b>                                 |       |               |                  |         |                 |      |        |      |
| ( $\pm$ )- $[^{18}\text{F}]\text{AIF(RESCA)-PEP04314}$ | Liver | Kidney Cortex | Heart Blood Pool | Bladder | Salivary Glands | Lung | Muscle | Bone |
|                                                        | 8.2   | 38.5          | 2.0              | 9.2     | 4.8             | 0.7  | 0.2    | 2.9  |
|                                                        |       |               |                  |         |                 |      |        |      |
| <b>Rhesus monkey D</b>                                 |       |               |                  |         |                 |      |        |      |
| $[^{18}\text{F}]\text{AIF(NOTA)-PEP04314}$             | Liver | Kidney Cortex | Heart Blood Pool | Bladder | Salivary Glands | Lung | Muscle | Bone |
|                                                        | 5.2   | 48.2          | 0.9              | 2.5     | 2.4             | 0.3  | 0.2    | 1.1  |
|                                                        | 7.2   | 45.6          | 0.8              | 3.6     | 3.5             | 0.3  | 0.2    | 0.7  |
